# Supplementary material
Source: PubMed Central journal article supplement (PMC4627590)
Supplement: NIHMS721319-supplement-Supplementary_Table_1.pdf [file NIHMS721319-supplement-Supplementary_Table_1.pdf]

**Supplementary Table 1. Standardized beta coefficients for block linear regression of % MVPA wear time**

|                                         | <b>Model 1</b> | <b>Model 2</b> | <b>Model 3</b> | <b>Model 4</b> |
|-----------------------------------------|----------------|----------------|----------------|----------------|
| Age                                     | 0.27**         | 0.26**         | 0.26**         | 0.26**         |
| Sex                                     | -0.16          | -0.17          | -0.17          | -0.18*         |
| Parents Education                       |                |                |                |                |
| Referent: 8 <sup>th</sup> grade or less |                |                |                |                |
| 1. Less than college                    | 0.18           | 0.23*          | 0.21*          | 0.21*          |
| 2. Any college                          | 0.008          | 0.04           | 0.02           | 0.02           |
| Parent BMI                              | 0.07           | 0.08           | 0.10           | 0.11           |
| Neighborhood Disorder                   |                | 0.18           | 0.20*          | 0.21*          |
| Parent Acculturation                    |                | -0.09          | -0.08          | -0.05          |
| BMI z score                             |                |                | -0.08          | -0.12          |
| TV viewing                              |                |                |                | -0.20*         |
| Adjusted r <sup>2</sup>                 | 0.08           | 0.12           | 0.12           | 0.15           |

\*\* p<0.05; \*p<0.1
